# Supplementary material for: Morphology evolution of urchin-like NiCo2O4 nanostructures and their applications as psuedocapacitors and photoelectrochemical cells
Source: Royal Society of Chemistry journal article supplement (doi:10.1039/c2jm34705a), 2012-01-01
Supplement: c2jm34705a.pdf [file c2jm34705a.pdf]

# Morphology evolution of urchin-like $\text{NiCo}_2\text{O}_4$ nanostructures and their applications as psuedocapacitors and photoelectrochemical cells

Qiufan Wang, Bin Liu, Xianfu Wang, Sihan Ran, Liming Wang, Di Chen\* and Guozhen Shen\*

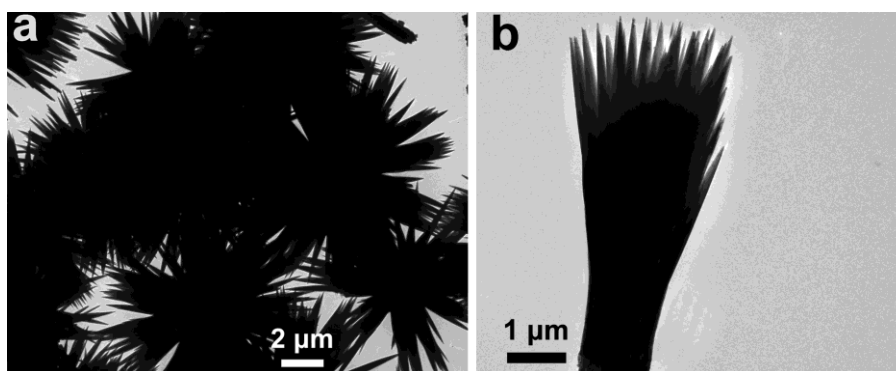

**Fig. S1** Typical TEM images of the straw-bundle-like  $\text{NiCo}_2\text{O}_4$  nanostructures.
